# Supplementary material for: Prevalence and social determinants of anxiety and depression among adults in Ghana: a systematic review and meta-analysis protocol
Source: PubMed Central journal article supplement (PMC11043746; doi:10.1136/bmjopen-2023-081927), 2024-04-23
Supplement: bmjopen-2023-081927supp004.pdf [file bmjopen-2023-081927supp004.pdf]

**Prevalence and social determinants of anxiety and depression among adults in Ghana: a systematic review and meta-analysis protocol**

**Supplementary Appendix 4: Data extraction form**

| Study Identification Features                                                                      |        |
|----------------------------------------------------------------------------------------------------|--------|
| Study ID/ record number                                                                            |        |
| Title and aim                                                                                      |        |
| First author last name                                                                             |        |
| Year of publication                                                                                |        |
| Publication type or Source of data (e.g., journal or report)                                       |        |
| Study Characteristics                                                                              |        |
| Age (M, SD) and range                                                                              |        |
| Gender                                                                                             |        |
| Socioeconomic status                                                                               |        |
| Chronic physical condition reported (e.g., cancer, diabetes, HIV/AIDs)                             |        |
| Sample size                                                                                        |        |
| Sampling methods (e.g., convenience sampling, random sampling)                                     |        |
| Geographic region                                                                                  |        |
| Geographical location (rural, urban mixed)                                                         |        |
| Recruitment setting (Community or clinical settings)                                               |        |
| Study design (e.g., cohort study, cross-sectional study)                                           |        |
| Time period of data collection                                                                     |        |
| Type of mental health condition(s) assessed (i.e. anxiety, depression, and psychological distress) |        |
| Structured diagnostic clinical interview                                                           | Yes/No |
| Name of diagnostic clinical interview                                                              |        |
| Screening tool                                                                                     | Yes/No |
| Name of screening tool and cutoff scores                                                           |        |
| Evidence of validity of the measurement instrument                                                 |        |
| Evidence of ethical approval                                                                       |        |
| Result Summary                                                                                     |        |
| Results Summary Prevalence <sup>a</sup>                                                            |        |
| Binary prevalence data (n/N) and percentage with 95% confidence intervals                          |        |
| Prevalence type (current, period or period or life time)                                           |        |
| Social determinants summary                                                                        |        |

| Domains of the Social determinants | Proximal factors identified |                    | Distal factors identified |                    |
|------------------------------------|-----------------------------|--------------------|---------------------------|--------------------|
|                                    | Risk factors                | Protective factors | Risk factors              | Protective factors |
| Demographic domain                 |                             |                    |                           |                    |
| Economic domain                    |                             |                    |                           |                    |
| Environmental domain               |                             |                    |                           |                    |
| Neighbourhood domain               |                             |                    |                           |                    |
| Social and cultural domain         |                             |                    |                           |                    |
| Reviewer comments, if any?         |                             |                    |                           |                    |
|                                    |                             |                    |                           |                    |

<sup>a</sup>Prevalence data will be extracted for all conditions, namely, depression, anxiety and psychological distress
